# Supplementary material for: Discovery of a new class of reversible TEA domain transcription factor inhibitors with a novel binding mode
Source: eLife journal article supplement (doi:10.7554/elife.80210), 2022-11-18
Supplement: fig2-data1 [file Figure 2-Source data 1.docx]

|  | **TEAD2-TM2** |
| --- | --- |
| **Data collection** |  |
| Wavelength (Å) | 0.979 |
| Resolution (Å2) | 50.00-2.40 (2.44-2.40) |
| Space group | *C*2 |
| Unit cell dimensions |  |
| *a*, *b*, *c* (Å) | 124.07, 62.29, 79.91 |
| *α*, *β*, *γ* (°) | 90.0, 117.7, 90.0 |
| Redundancy | 3.6 (2.8) |
| Completeness (%) | 97.0 (83.7) |
| Reflections (unique) | 20, 774 |
| *I*/*σI* | 24.1 (1.5) |
| *R*sym (%) | 5.2 (68.0) |
| *R*pim (%) | 3.1 (45.6) |
| CC1/2a | 0.720 |
| **Refinement** |  |
| No. of non-hydrogen atoms | 3, 393 |
| Protein | 3, 299 |
| Ligand | 64 |
| Water | 30 |
| Average *B* factor (Å2) | 48.9 |
| Protein | 49.0 |
| Ligand | 47.2 |
| Water | 42.7 |
| *R*work/*R*free (%) | 18.38/23.46 |
| RMSDs |  |
| Bond length (Å) | 0.008 |
| Bond angle (°) | 1.099 |
| Favored/allowed/outliers (%) | 92.75/7.25/0.00 |

Values for the highest resolution shell are given in parentheses.

aCC1/2 values shown are for the highest resolution shell.
